# Supplementary material for: The Botanical, Chemical and Ethnobotanical Diversity of Southern African Lamiaceae
Source: MDPI journal article supplement (doi:10.3390/molecules26123712), 2021-06-18
Supplement: s1 [file s1]

**Table S1.** List of all southern African Lamiaceae (naturalized non-indigenous species are indicated with an asterisk).

| Genus                                   | Species                                                                                                                                                  |
|-----------------------------------------|----------------------------------------------------------------------------------------------------------------------------------------------------------|
| <i>Acrotome</i> Benth. ex Endl.         | <i>Acrotome angustifolia</i> G.Taylor.                                                                                                                   |
|                                         | <i>Acrotome fleckii</i> (Gürke) Launert                                                                                                                  |
|                                         | <i>Acrotome hispida</i> Benth.                                                                                                                           |
|                                         | <i>Acrotome inflata</i> Benth.                                                                                                                           |
|                                         | <i>Acrotome pallescens</i> Benth.                                                                                                                        |
|                                         | <i>Acrotome thorncroftii</i> Skan                                                                                                                        |
| <i>Aeollanthus</i> C.Mart. ex Spreng.   | <i>Aeollanthus buchnerianus</i> Briq.                                                                                                                    |
|                                         | <i>Aeollanthus namibiensis</i> Ryding                                                                                                                    |
|                                         | <i>Aeollanthus neglectus</i> (Dinter) Launert                                                                                                            |
|                                         | <i>Aeollanthus parvifolius</i> Benth.                                                                                                                    |
|                                         | <i>Aeollanthus rehmannii</i> Gürke                                                                                                                       |
|                                         | <i>Aeollanthus suaveolens</i> Mart. ex Spreng.                                                                                                           |
| <i>Ajuga</i> L.                         | <i>Ajuga ophrydis</i> Burch. ex Benth                                                                                                                    |
| <i>Basilicum</i> Moench                 | <i>Basilicum polystachyon</i> (L.) Moench                                                                                                                |
| <i>Cantinoa</i> Harley & J.F.B.Pastore* | <i>Cantinoa americana</i> (Aubl.) Harley & J.F.B.Pastore [= <i>Hyptis spicigera</i> Lam.]*                                                               |
|                                         | <i>Cantinoa mutabilis</i> (Rich.) Harley & J.F.B.Pastore [= <i>Hyptis mutabilis</i> (Rich.) Briq.]*                                                      |
| <i>Cedronella</i> Moench*               | <i>Cedronella canariensis</i> (L.) Webb & Berthel.*                                                                                                      |
| <i>Clerodendrum</i> L.                  | <i>Clerodendrum africanum</i> Moldenke                                                                                                                   |
|                                         | <i>Clerodendrum buchneri</i> Gürke                                                                                                                       |
|                                         | <i>Clerodendrum bungei</i> Steud.*                                                                                                                       |
|                                         | <i>Clerodendrum pleiosciadium</i> Gürke                                                                                                                  |
|                                         | <i>Clerodendrum ternatum</i> Schinz [= <i>C. transvaalense</i> B.Thomas]                                                                                 |
| <i>Coleus</i> Lour.                     | <i>Coleus aliciae</i> (Codd) A.J.Paton [= <i>Plectranthus aliciae</i> (Codd) van Jaarsv. & T.J.Edwards]                                                  |
|                                         | <i>Coleus amboinicus</i> Lour. [= <i>Plectranthus amboinicus</i> (Lour.) Spreng.]                                                                        |
|                                         | <i>Coleus barbatus</i> (Andrews) Benth. ex G.Don [= <i>Plectranthus barbatus</i> Andrews]*                                                               |
|                                         | <i>Coleus barbatus</i> var. <i>grandis</i> (L.H.Cramer) A.J.Paton [= <i>Plectranthus barbatus</i> var. <i>grandis</i> (L.H.Cramer) Likhoba & A.J.Paton]* |
|                                         | <i>Coleus bojeri</i> Benth. [= <i>Solenostemon latifolius</i> (Hochst. ex Benth.) J.K.Morton]                                                            |
|                                         | <i>Coleus calycinus</i> (Benth.) A.J.Paton [= <i>Isodon calycinus</i> (Benth.) H.W.Li and <i>Rabdosiella calycina</i> (Benth.) Codd]                     |
|                                         | <i>Coleus caninus</i> (Roth) Vatke [= <i>Plectranthus caninus</i> Roth]                                                                                  |
|                                         | <i>Coleus comosus</i> Hochst. ex Gürke [= <i>Plectranthus ornatus</i> Codd]*                                                                             |
|                                         | <i>Coleus cylindraceus</i> (Hochst. ex Benth.) A.J.Paton [= <i>Plectranthus montanus</i> Benth.]                                                         |
|                                         | <i>Coleus dinteri</i> (Briq.) A.J.Paton [= <i>Plectranthus dinteri</i> Briq.]                                                                            |
|                                         | <i>Coleus dolichopodus</i> (Briq.) A.J.Paton [= <i>Plectranthus dolichopodus</i> Briq.]                                                                  |

| Genus                                           | Species                                                                                                                                                                                                                                                                                                                                                                                                                          |
|-------------------------------------------------|----------------------------------------------------------------------------------------------------------------------------------------------------------------------------------------------------------------------------------------------------------------------------------------------------------------------------------------------------------------------------------------------------------------------------------|
|                                                 | <i>Coleus esculentus</i> (N.E.Br.) G.Taylor [= <i>Plectranthus esculentus</i> N.E.Br.]                                                                                                                                                                                                                                                                                                                                           |
|                                                 | <i>Coleus gibbosus</i> A.J.Paton [= <i>Plectranthus rehmannii</i> Gürke]                                                                                                                                                                                                                                                                                                                                                         |
|                                                 | <i>Coleus gracilipedicellatum</i> (Robyns & Lebrun) A.J.Paton [= <i>Holostylon baumii</i> (Gürke) G.Taylor]                                                                                                                                                                                                                                                                                                                      |
|                                                 | <i>Coleus grandidentatus</i> (Gürke) A.J.Paton [= <i>Plectranthus grandidentatus</i> Gürke]                                                                                                                                                                                                                                                                                                                                      |
|                                                 | <i>Coleus guerkei</i> (Briq.) A.J.Paton [= <i>Neohyptis paniculata</i> (Baker) J.K.Morton]                                                                                                                                                                                                                                                                                                                                       |
|                                                 | <i>Coleus hadiensis</i> (Forssk.) A.J.Paton [= <i>P. cyaneus</i> Gürke, <i>P. hadiensis</i> (Forssk.) Schweinf. ex Sprenger, <i>P. hadiensis</i> (Forssk.) Schweinf. ex Spreng. var. <i>hadiensis</i> , <i>P. hadiensis</i> (Forssk.) Schweinf. ex Spreng. var. <i>tomentosus</i> (Benth.) Codd, <i>P. hadiensis</i> (Forssk.) Schweinf. ex Spreng. var. <i>woodii</i> (Gürke) Codd and <i>P. ramosior</i> (Benth.) van Jaarsv.] |
|                                                 | <i>Coleus hereroensis</i> (Engl.) A.J.Paton [= <i>Plectranthus hereroensis</i> Engl.]                                                                                                                                                                                                                                                                                                                                            |
|                                                 | <i>Coleus kirkii</i> (Baker) A.J.Paton [= <i>Pycnostachys reticulata</i> (E.Mey.) Benth.]                                                                                                                                                                                                                                                                                                                                        |
|                                                 | <i>Coleus lasianthus</i> Gürke [= <i>Plectranthus tetensis</i> (Baker) Agnew]                                                                                                                                                                                                                                                                                                                                                    |
|                                                 | <i>Coleus livingstonei</i> A.J.Paton [= <i>Pycnostachys urticifolia</i> Hook.]                                                                                                                                                                                                                                                                                                                                                   |
|                                                 | <i>Coleus madagascariensis</i> (Pers.) A.Chev. [= <i>Plectranthus madagascariensis</i> (Pers.) Benth. and <i>Plectranthus madagascariensis</i> (Pers.) Benth. var. <i>madagascariensis</i> ]                                                                                                                                                                                                                                     |
|                                                 | <i>Coleus mutabilis</i> (Codd) A.J.Paton [= <i>Plectranthus mutabilis</i> Codd]                                                                                                                                                                                                                                                                                                                                                  |
|                                                 | <i>Coleus neochilus</i> (Schltr.) Codd [= <i>Plectranthus neochilus</i> Schltr.]                                                                                                                                                                                                                                                                                                                                                 |
|                                                 | <i>Coleus pentheri</i> Gürke [= <i>Plectranthus pentheri</i> (Gürke ex Zahlbr.) van Jaarsv. & T.J.Edwards]                                                                                                                                                                                                                                                                                                                       |
|                                                 | <i>Coleus porcatus</i> (van Jaarsv. & P.J.D.Winter) A.J.Paton [= <i>Plectranthus porcatus</i> van Jaarsv. & P.J.D.Winter]                                                                                                                                                                                                                                                                                                        |
|                                                 | <i>Coleus psammophilus</i> (Codd) A.J.Paton [= <i>Plectranthus psammophilus</i> Codd]                                                                                                                                                                                                                                                                                                                                            |
|                                                 | <i>Coleus rhodesianum</i> (N.E.Br.) A.J.Paton [= <i>Englerastrum schweinfurthii</i> Briq.]                                                                                                                                                                                                                                                                                                                                       |
|                                                 | <i>Coleus rotundifolius</i> (Poir.) A.Chev. & Perrot [= <i>Plectranthus rotundifolius</i> (Poir.) Spreng. and <i>Solenostemon rotundifolius</i> (Poir.) J.K.Morton]                                                                                                                                                                                                                                                              |
|                                                 | <i>Coleus stenostachys</i> (Baker) A.J.Paton & Phillipson [= <i>Pycnostachys coerulea</i> Hook.]                                                                                                                                                                                                                                                                                                                                 |
|                                                 | <i>Coleus subspicatus</i> (Hochst.) Walp. [= <i>Plectranthus spicatus</i> E. Mey. ex Benth.]                                                                                                                                                                                                                                                                                                                                     |
|                                                 | <i>Coleus tetragonus</i> (Gürke) Robyns & Lebrun [= <i>Plectranthus tetragonus</i> Gürke]                                                                                                                                                                                                                                                                                                                                        |
|                                                 | <i>Coleus unguentarius</i> (Codd) A.J.Paton [= <i>Plectranthus unguentarius</i> Codd]                                                                                                                                                                                                                                                                                                                                            |
|                                                 | <i>Coleus venterii</i> (van Jaarsv. & L.Hankey) A.J.Paton [= <i>Plectranthus venterii</i> van Jaarsv. & L.Hankey]                                                                                                                                                                                                                                                                                                                |
|                                                 | <i>Coleus xerophilus</i> (Codd) A.J.Paton [= <i>Plectranthus xerophilus</i> Codd]                                                                                                                                                                                                                                                                                                                                                |
| <i>Endostemon</i> N.E.Br.                       | <i>Endostemon obtusifolius</i> (E.Mey.) N.E.Br.                                                                                                                                                                                                                                                                                                                                                                                  |
|                                                 | <i>Endostemon tenuiflorus</i> (Benth.) M.R.Ashby                                                                                                                                                                                                                                                                                                                                                                                 |
|                                                 | <i>Endostemon tereticaulis</i> (Poir.) M.R.Ashby                                                                                                                                                                                                                                                                                                                                                                                 |
| <i>Equilabium</i> Mwany.,<br>A.J.Paton & Culham | <i>Equilabium candelabrifforme</i> (Launert) Mwany. & A.J.Paton [= <i>Plectranthus candelabrifformis</i> Launert]                                                                                                                                                                                                                                                                                                                |

| Genus                                           | Species                                                                                                                                                                                             |
|-------------------------------------------------|-----------------------------------------------------------------------------------------------------------------------------------------------------------------------------------------------------|
|                                                 | <i>Equilabium dolomiticum</i> (Codd) Mwany. & A.J.Paton [= <i>Plectranthus dolomiticus</i> Codd]                                                                                                    |
|                                                 | <i>Equilabium laxiflorum</i> (Benth.) Mwany. & A.J.Paton [= <i>Plectranthus laxiflorus</i> Benth.]                                                                                                  |
|                                                 | <i>Equilabium petiolare</i> (Benth.) Mwany. & A.J.Paton [= <i>Plectranthus petiolaris</i> E. Mey. ex Benth.]                                                                                        |
| <i>Haumaniastrum</i> P.A.Duvign. & Plancke      | <i>Haumaniastrum sericeum</i> (Briq.) A.J.Paton [= <i>Acrocephalus sericeus</i> Briq.]                                                                                                              |
| <i>Hoslundia</i> Vahl                           | <i>Hoslundia opposita</i> Vahl                                                                                                                                                                      |
| <i>Khalarahia</i> Baill                         | <i>Kalaharia uncinata</i> (Schinz) Moldenke [= <i>Rothea uncinata</i> (Schinz) P.P.J.Herman & Retief]                                                                                               |
| <i>Karomia</i> Dop                              | <i>Karomia speciosa</i> (Hutch. & Corbishley) R.Fern. [= <i>K. speciosa</i> (Hutch. & Corbishley) R.Fern. forma <i>flava</i> (Moldenke) R.Fern.]                                                    |
|                                                 | <i>Karomia speciosa</i> (Hutch. & Corbishley) R.Fern. forma <i>speciosa</i>                                                                                                                         |
| <i>Killickia</i> Bräuchler, Heubl<br>Doroszenko | <i>Killickia compacta</i> (Killick) Bräuchler, Heubl & Doroszenko                                                                                                                                   |
|                                                 | <i>Killickia grandiflora</i> (Killick) Bräuchler, Heubl & Doroszenko                                                                                                                                |
|                                                 | <i>Killickia lutea</i> Bräuchler                                                                                                                                                                    |
|                                                 | <i>Killickia pilosa</i> (Benth.) Bräuchler, Heubl & Doroszenko                                                                                                                                      |
| <i>Lamium</i> L.*                               | <i>Lamium amplexicaule</i> L.*                                                                                                                                                                      |
|                                                 | <i>Lamium galeobdolon</i> (L.) L.*                                                                                                                                                                  |
| <i>Leonotis</i> (Pers.) R.Br.                   | <i>Leonotis leonurus</i> (L.) R.Br.                                                                                                                                                                 |
|                                                 | <i>Leonotis nepetifolia</i> (L.) R.Br.                                                                                                                                                              |
|                                                 | <i>Leonotis ocymifolia</i> (Burm.f.) Iwarsson [= <i>L. dubia</i> E.Mey. ex Benth.]                                                                                                                  |
|                                                 | <i>Leonotis ocymifolia</i> (Burm.f.) Iwarsson var. <i>ocymifolia</i> [= <i>Leonotis leonitis</i> (L.) R.Br. and <i>Leonotis mollis</i> Benth.]                                                      |
|                                                 | <i>Leonotis ocymifolia</i> var. <i>raineriana</i> (Vis.) Iwarsson [= <i>L. intermedia</i> Lindl.]                                                                                                   |
|                                                 | <i>Leonotis ocymifolia</i> var. <i>schinzii</i> (Gürke) Iwarsson [= <i>L. randii</i> S.Moore and <i>L. schinzii</i> Gürke]                                                                          |
| <i>Leucas</i> R.Br.                             | <i>Leucas capensis</i> (Benth.) Engl. [= <i>Leonotis pentadentata</i> J.C.Manning Goldblatt ]                                                                                                       |
|                                                 | <i>Leucas ebracteata</i> var. <i>kaokoveldensis</i> Sebald [= <i>Leonotis ebracteata</i> var. <i>kaokoveldensis</i> (Sebald) J.C.Manning & Goldblatt]                                               |
|                                                 | <i>Leucas glabrata</i> (Vahl) Sm. [= <i>Leonotis glabrata</i> (Vahl) J.C.Manning & Goldblatt var. <i>glabrata</i> and <i>Leonotis glabrata</i> var. <i>linearis</i> (Codd) J.C.Manning & Goldblatt] |
|                                                 | <i>Leucas lavandulifolia</i> Sm.*                                                                                                                                                                   |
|                                                 | <i>Leucas martinicensis</i> (Jacq.) R.Br. [= <i>Leonotis martinicensis</i> (Jacq.) J.C.Manning Goldblatt]                                                                                           |
|                                                 | <i>Leucas neuflizeana</i> Courbon [= <i>Leonotis neuflizeana</i> (Courbon) J.C.Manning & Goldblatt]                                                                                                 |
|                                                 | <i>Leucas pechuelii</i> (Kuntze) Baker [= <i>Leonotis pechuelii</i> (Kuntze) J.C.Manning & Goldblatt]                                                                                               |
|                                                 | <i>Leucas sexdentata</i> Skan [= <i>Leonotis sexdentata</i> (Skan) J.C.Manning & Goldblatt]                                                                                                         |
| <i>Marrubium</i> L.*                            | <i>Marrubium vulgare</i> L.*                                                                                                                                                                        |

| Genus                         | Species                                                                                                                                |
|-------------------------------|----------------------------------------------------------------------------------------------------------------------------------------|
| <i>Mentha</i> L.              | <i>Mentha aquatica</i> L.                                                                                                              |
|                               | <i>Mentha longifolia</i> (L.) L.                                                                                                       |
|                               | <i>Mentha longifolia</i> subsp. <i>capensis</i> (Thunb.) Briq                                                                          |
|                               | <i>Mentha longifolia</i> subsp. <i>polyadena</i> (Briq.) Briq.                                                                         |
|                               | <i>Mentha longifolia</i> subsp. <i>wissii</i> (Launert) Codd                                                                           |
|                               | <i>Mentha pulegium</i> L.*                                                                                                             |
| <i>Mesosphaerum</i> P.Browne* | <i>Mesosphaerum pectinatum</i> (L.) Kuntze*                                                                                            |
| <i>Micromeria</i> Benth.      | <i>Micromeria biflora</i> (Buch.-Ham. ex D.Don) Benth. [= <i>Satureja biflora</i> (Buch.-Ham. ex D.Don) Briq.]                         |
| <i>Ocimum</i> L.              | <i>Ocimum africanum</i> Lour.                                                                                                          |
|                               | <i>Ocimum americanum</i> L.                                                                                                            |
|                               | <i>Ocimum americanum</i> L. var. <i>americanum</i>                                                                                     |
|                               | <i>Ocimum angustifolium</i> Benth.                                                                                                     |
|                               | <i>Ocimum burchellianum</i> Benth.                                                                                                     |
|                               | <i>Ocimum coddii</i> (S.D.Williams & K.Balkwill) A.J.Paton                                                                             |
|                               | <i>Ocimum dolomiticola</i> A.J.Paton                                                                                                   |
|                               | <i>Ocimum filamentosum</i> Forssk. [= <i>Becium filamentosum</i> (Forssk.) Chiov.]                                                     |
|                               | <i>Ocimum gratissimum</i> L. [= <i>Ocimum urticifolium</i> Roth]                                                                       |
|                               | <i>Ocimum gratissimum</i> L. subsp. <i>gratissimum</i> var. <i>gratissimum</i>                                                         |
|                               | <i>Ocimum labiatum</i> (N.E.Br.) A.J.Paton                                                                                             |
|                               | <i>Ocimum natalense</i> Ayob. ex A.J.Paton                                                                                             |
|                               | <i>Ocimum obovatum</i> E.Mey. ex Benth. [= <i>Becium grandiflorum</i> var. <i>obovatum</i> (E.Mey. ex Benth.) Sebald]                  |
|                               | <i>O. obovatum</i> E.Mey. ex Benth. subsp. <i>obovatum</i> var. <i>obovatum</i>                                                        |
|                               | <i>Ocimum obovatum</i> E.Mey. ex Benth. subsp. <i>obovatum</i> var. <i>galpinii</i> (Gürke) A.J.Paton                                  |
|                               | <i>Ocimum pseudoserratum</i> (M.R.Ashby) A.J.Paton                                                                                     |
|                               | <i>Ocimum reclinatum</i> (S.D.Williams & M.Balkwill) A.J.Paton                                                                         |
|                               | <i>Ocimum serratum</i> (Schltr.) A.J.Paton                                                                                             |
|                               | <i>Ocimum tubiforme</i> (R.D.Good) A.J.Paton                                                                                           |
|                               | <i>Ocimum waterbergense</i> (S.D.Williams & K.Balkwill) A.J.Paton                                                                      |
| <i>Orthosiphon</i> Benth      | <i>Orthosiphon fruticosus</i> Codd                                                                                                     |
|                               | <i>Orthosiphon rubicundus</i> (D.Don) Benth.                                                                                           |
|                               | <i>Orthosiphon thymiflorus</i> (Roth) Sleseen [= <i>O. marmoritis</i> (Hance) Dunn and <i>O. suffrutescens</i> (Schumach.) J.K.Morton] |
|                               | <i>Orthosiphon vernalis</i> Codd                                                                                                       |
| <i>Platostoma</i> P.Beauv.    | <i>Platostoma rotundifolium</i> (Briq.) A.J.Paton [= <i>Geniosporum rotundifolium</i> Briq.]                                           |
| <i>Plectranthus</i> L'Hér     | <i>Plectranthus ambiguus</i> (Bolus) Codd                                                                                              |
|                               | <i>Plectranthus brevimentum</i> T.J.Edwards                                                                                            |
|                               | <i>Plectranthus ciliatus</i> E.Mey.                                                                                                    |

| Genus                        | Species                                                                                          |
|------------------------------|--------------------------------------------------------------------------------------------------|
|                              | <i>Plectranthus ecklonii</i> Benth.                                                              |
|                              | <i>Plectranthus elegantulus</i> Briq.                                                            |
|                              | <i>Plectranthus ernstii</i> Codd                                                                 |
|                              | <i>Plectranthus fruticosus</i> L'Hér.                                                            |
|                              | <i>Plectranthus grallatus</i> Briq.                                                              |
|                              | <i>Plectranthus hilliardiae</i> Codd                                                             |
|                              | <i>Plectranthus hilliardiae</i> Codd subsp. <i>hilliardiae</i>                                   |
|                              | <i>Plectranthus hilliardiae</i> subsp. <i>australis</i> van Jaarsv. & A.E.van Wyk                |
|                              | <i>Plectranthus lasianthus</i> (Gürke) Vollesen                                                  |
|                              | <i>Plectranthus lucidus</i> (Benth.) van Jaarsv. & T.J.Edwards                                   |
|                              | <i>Plectranthus malvinus</i> van Jaarsv. & T.J.Edwards                                           |
|                              | <i>Plectranthus mirabilis</i> (Briq.) Launert                                                    |
|                              | <i>Plectranthus mzimvubuensis</i> van Jaarsv.                                                    |
|                              | <i>Plectranthus oertendahlii</i> Th. Fr. Jr.                                                     |
|                              | <i>Plectranthus oribiensis</i> Codd                                                              |
|                              | <i>Plectranthus praetermissus</i> Codd                                                           |
|                              | <i>Plectranthus purpuratus</i> Harv.                                                             |
|                              | <i>Plectranthus purpuratus</i> Harv. subsp. <i>purpuratus</i>                                    |
|                              | <i>Plectranthus purpuratus</i> subsp. <i>montanus</i> van Jaarsv. & T.J.Edwards                  |
|                              | <i>Plectranthus purpuratus</i> subsp. <i>tongaensis</i> van Jaarsv. & T.J.Edwards                |
|                              | <i>Plectranthus reflexus</i> van Jaarsv. & T.J.Edwards                                           |
|                              | <i>Plectranthus rubropunctatus</i> Codd                                                          |
|                              | <i>Plectranthus saccatus</i> Benth.                                                              |
|                              | <i>Plectranthus saccatus</i> subsp. <i>pondoensis</i> van Jaarsv. & T.J.Edwards                  |
|                              | <i>Plectranthus saccatus</i> var. <i>longitubus</i> Codd                                         |
|                              | <i>Plectranthus saccatus</i> var. <i>saccatus</i> Benth.                                         |
|                              | <i>Plectranthus strigosus</i> Benth.                                                             |
|                              | <i>Plectranthus stylesii</i> T.J.Edwards                                                         |
|                              | <i>Plectranthus spicatus</i> E.Mey.                                                              |
|                              | <i>Plectranthus swynertonii</i> S.Moore                                                          |
|                              | <i>Plectranthus verticillatus</i> (L.f.) Druce                                                   |
|                              | <i>Plectranthus zuluensis</i> T.Cooke                                                            |
| <i>Premna</i> L.             | <i>Premna senensis</i> Klotzsch                                                                  |
| <i>Prunella</i> L.*          | <i>Prunella vulgaris</i> L. [=P. <i>vulgaris</i> var. <i>vulgaris</i> ]*                         |
| <i>Pseudodictamnus</i> Fabr. | <i>Pseudodictamnus africanus</i> (L.) Salmaki & Siadat [=Ballota <i>africana</i> (L.) Benth.]    |
| <i>Rabdosiella</i> Codd.     | <i>Rabdosiella leemannii</i> N.Hahn                                                              |
| <i>Rotheca</i> Raf.          | <i>Rotheca caerulea</i> (N.E.Br.) P.P.J.Herman & Retief [=Clerodendrum <i>caeruleum</i> N.E.Br.] |
|                              | <i>Rotheca cuneiformis</i> (Moldenke) P.P.J.Herman & Retief                                      |

| Genus     | Species                                                                                                                                                                                                          |
|-----------|------------------------------------------------------------------------------------------------------------------------------------------------------------------------------------------------------------------|
| Rothea    | <i>Rothea hirsuta</i> (Hochst.) R.Fern.                                                                                                                                                                          |
|           | <i>Rothea hirsuta</i> (Hochst.) R.Fern. <i>forma hirsuta</i>                                                                                                                                                     |
|           | <i>Rothea hirsuta</i> (Hochst.) R.Fern. <i>forma triphylla</i> (Harv.) Fernald                                                                                                                                   |
|           | <i>Rothea louwalbertsii</i> (P.P.J.Herman) P.P.J.Herman & Retief                                                                                                                                                 |
|           | <i>Rothea makanjana</i> (H.J.P.Winkl.) Steane & Mabb. [= <i>Clerodendrum makanjanum</i> H.J.P.Winkl.]                                                                                                            |
|           | <i>Rothea myricoides</i> (Hochst.) Steane & Mabb.                                                                                                                                                                |
|           | <i>Rothea myricoides</i> (Hochst.) Steane & Mabb. <i>subsp. myricoides var. myricoides</i>                                                                                                                       |
|           | <i>Rothea pilosa</i> (H.Pearson) P.P.J.Herman & Retief                                                                                                                                                           |
|           | <i>Rothea suffruticosa</i> (Gürke) Verdc. [= <i>Clerodendrum suffruticosum</i> Gürke, <i>C. suffruticosum</i> Gürke <i>var. natalense</i> Moldenke and <i>C. suffruticosum</i> Gürke <i>var. suffruticosum</i> ] |
|           | <i>Rothea violacea</i> (Gürke) Verdc. [= <i>Clerodendrum violaceum</i> Gürke]                                                                                                                                    |
|           | <i>Rothea wildii</i> (Moldenke) R.Fern.                                                                                                                                                                          |
|           | <i>Rothea wildii</i> (Moldenke) R.Fern. <i>forma glabra</i> (R.Fern.) R.Fern.                                                                                                                                    |
| Salvia L. | <i>Salvia africana</i> L. [= <i>S. africana-caerulea</i> L.]                                                                                                                                                     |
|           | <i>Salvia albicaulis</i> Benth.                                                                                                                                                                                  |
|           | <i>Salvia aurea</i> L. [= <i>S. africana-lutea</i> L.]                                                                                                                                                           |
|           | <i>Salvia aurita</i> L.f.                                                                                                                                                                                        |
|           | <i>Salvia aurita</i> L.f. <i>var. aurita</i>                                                                                                                                                                     |
|           | <i>Salvia aurita var. galpinii</i> (Skan) Hedge                                                                                                                                                                  |
|           | <i>Salvia chamelaeagnea</i> Berg.                                                                                                                                                                                |
|           | <i>Salvia coccinea</i> Buc'hoz ex Etl. [= <i>S. coccinea</i> L.f.]                                                                                                                                               |
|           | <i>Salvia dentata</i> Aiton                                                                                                                                                                                      |
|           | <i>Salvia disermas</i> L.                                                                                                                                                                                        |
|           | <i>Salvia dolomitica</i> Codd                                                                                                                                                                                    |
|           | <i>Salvia garipensis</i> E. Mey.                                                                                                                                                                                 |
|           | <i>Salvia granitica</i> Hochst.                                                                                                                                                                                  |
|           | <i>Salvia lanceolata</i> Lam.                                                                                                                                                                                    |
|           | <i>Salvia muirii</i> L.Bolus                                                                                                                                                                                     |
|           | <i>Salvia namaensis</i> Schinz                                                                                                                                                                                   |
|           | <i>Salvia obtusata</i> Thunb.                                                                                                                                                                                    |
|           | <i>Salvia radula</i> Benth.                                                                                                                                                                                      |
|           | <i>Salvia reflexa</i> Hornem.*                                                                                                                                                                                   |
|           | <i>Salvia repens</i> Burch. ex Benth.                                                                                                                                                                            |
|           | <i>Salvia repens</i> Burch. ex Benth. <i>var. repens</i>                                                                                                                                                         |
|           | <i>Salvia repens var. keiensis</i> Hedge                                                                                                                                                                         |
|           | <i>Salvia repens var. transvaalensis</i> Hedge                                                                                                                                                                   |
|           | <i>Salvia runcinata</i> L.f.                                                                                                                                                                                     |
|           | <i>Salvia scabra</i> Thunb.                                                                                                                                                                                      |

| Genus                | Species                                                     |
|----------------------|-------------------------------------------------------------|
|                      | <i>Salvia schlechteri</i> Briq.                             |
|                      | <i>Salvia sclarea</i> L.*                                   |
|                      | <i>Salvia stenophylla</i> Burch. ex Benth.                  |
|                      | <i>Salvia thermarum</i> van Jaarsv.                         |
|                      | <i>Salvia tiliifolia</i> Vahl*                              |
|                      | <i>Salvia triangularis</i> Thunb.                           |
|                      | <i>Salvia tysonii</i> Skan                                  |
|                      | <i>Salvia verbenaca</i> L.*                                 |
| <i>Satureja</i> L.*  | <i>Satureja thymbra</i> L.*                                 |
| <i>Scutellaria</i> * | <i>Scutellaria racemosa</i> Pers.*                          |
| <i>Stachys</i> L.    | <i>Stachys aethiopica</i> L.                                |
|                      | <i>Stachys albiflora</i> N.E.Br.                            |
|                      | <i>Stachys arachnoidea</i> Codd                             |
|                      | <i>Stachys arvensis</i> (L.) L.*                            |
|                      | <i>Stachys aurea</i> Benth.                                 |
|                      | <i>Stachys bolusii</i> Skan                                 |
|                      | <i>Stachys burchelliana</i> Launert                         |
|                      | <i>Stachys caffra</i> E.Mey. ex Benth.                      |
|                      | <i>Stachys comosa</i> Codd                                  |
|                      | <i>Stachys cuneata</i> Banks ex Benth.                      |
|                      | <i>Stachys cymbalaria</i> Briq.                             |
|                      | <i>Stachys dinteri</i> Launert                              |
|                      | <i>Stachys dregeana</i> Benth                               |
|                      | <i>Stachys erectiuscula</i> Gürke                           |
|                      | <i>Stachys flavescens</i> Benth.                            |
|                      | <i>Stachys flexuosa</i> Skan                                |
|                      | <i>Stachys graciliflora</i> C.Presl                         |
|                      | <i>Stachys grandifolia</i> E. Mey.                          |
|                      | <i>Stachys humifusa</i> Burch. ex Benth.                    |
|                      | <i>Stachys hyssopoides</i> Burch. ex Benth.                 |
|                      | <i>Stachys kuntzei</i> Gürke                                |
|                      | <i>Stachys lamarckii</i> Benth.                             |
|                      | <i>Stachys linearis</i> Burch. ex Benth.                    |
|                      | <i>Stachys malacophylla</i> Skan                            |
|                      | <i>Stachys natalensis</i> Hochst.                           |
|                      | <i>Stachys natalensis</i> Hochst. var. <i>natalensis</i>    |
|                      | <i>Stachys natalensis</i> var. <i>galpinii</i> (Briq.) Codd |
|                      | <i>Stachys nigricans</i> Benth.                             |
|                      | <i>Stachys obtusifolia</i> MacOwan                          |

| Genus                                 | Species                                                                                           |
|---------------------------------------|---------------------------------------------------------------------------------------------------|
|                                       | <i>Stachys rehmannii</i> Skan                                                                     |
|                                       | <i>Stachys reticulata</i> Codd                                                                    |
|                                       | <i>Stachys rivularis</i> J.M.Wood & M.S.Evans                                                     |
|                                       | <i>Stachys rudatisii</i> Skan                                                                     |
|                                       | <i>Stachys rugosa</i> Aiton                                                                       |
|                                       | <i>Stachys scabrida</i> Skan                                                                      |
|                                       | <i>Stachys sessilifolia</i> E.Mey.                                                                |
|                                       | <i>Stachys sessilis</i> Gürke                                                                     |
|                                       | <i>Stachys simplex</i> Schltr.                                                                    |
|                                       | <i>Stachys spathulata</i> Burch. ex Benth.                                                        |
|                                       | <i>Stachys sublobata</i> Skan                                                                     |
|                                       | <i>Stachys thunbergii</i> Benth.                                                                  |
|                                       | <i>Stachys tubulosa</i> MacOwan                                                                   |
|                                       | <i>Stachys tysonii</i> Skan                                                                       |
|                                       | <i>Stachys zeyheri</i> Skan                                                                       |
| <i>Syncolostemon</i> E.Mey. ex Benth. | <i>Syncolostemon albiflorus</i> (N.E.Br.) D.F.Otieno                                              |
|                                       | <i>Syncolostemon argenteus</i> N.E.Br.                                                            |
|                                       | <i>Syncolostemon aurulentus</i> Ngwenya                                                           |
|                                       | <i>Syncolostemon bolusii</i> (N.E.Br.) D.F.Otieno                                                 |
|                                       | <i>Syncolostemon bracteosus</i> (Benth.) D.F.Otieno [= <i>Hemizygia bracteosa</i> (Benth.) Briq.] |
|                                       | <i>Syncolostemon canescens</i> (Gürke) D.F.Otieno                                                 |
|                                       | <i>Syncolostemon cinereum</i> (Codd) D.F.Otieno & Retief                                          |
|                                       | <i>Syncolostemon comptonii</i> Codd                                                               |
|                                       | <i>Syncolostemon concinnus</i> N.E.Br.                                                            |
|                                       | <i>Syncolostemon densiflorus</i> Benth.                                                           |
|                                       | <i>Syncolostemon elliottii</i> (Baker) D.F.Otieno                                                 |
|                                       | <i>Syncolostemon eriocephalus</i> I.Verd.                                                         |
|                                       | <i>Syncolostemon floccosus</i> (Launert) D.F.Otieno                                               |
|                                       | <i>Syncolostemon foliosus</i> (S.Moore) D.F.Otieno                                                |
|                                       | <i>Syncolostemon gerrardii</i> (N.E.Br.) D.F.Otieno                                               |
|                                       | <i>Syncolostemon incanus</i> (Codd) D.F.Otieno                                                    |
|                                       | <i>Syncolostemon latidens</i> (N.E.Br.) Codd                                                      |
|                                       | <i>Syncolostemon linearis</i> (Benth.) D.F.Otieno                                                 |
|                                       | <i>Syncolostemon macranthus</i> (Gürke) Ashby                                                     |
|                                       | <i>Syncolostemon macrophyllus</i> Gürke                                                           |
|                                       | <i>Syncolostemon modestus</i> (Codd) D.F.Otieno                                                   |
|                                       | <i>Syncolostemon obermeyerae</i> (M.Ashby) D.F.Otieno                                             |
|                                       | <i>Syncolostemon parviflorus</i> E.Mey. ex Benth.                                                 |
|                                       | <i>Syncolostemon parviflorus</i> E.Mey. ex Benth. <i>var. lanceolatus</i> (Gürke) Codd            |



| Genus                           | Species                                                                                          |
|---------------------------------|--------------------------------------------------------------------------------------------------|
|                                 | <i>Syncolostemon parviflorus</i> E.Mey. ex Benth. var. <i>parviflorus</i>                        |
|                                 | <i>Syncolostemon parvifolius</i> (Codd) D.F.Otieno                                               |
|                                 | <i>Syncolostemon persimilis</i> (N.E.Br.) D.F.Otieno                                             |
|                                 | <i>Syncolostemon petiolatus</i> (Ashby) D.F.Otieno                                               |
|                                 | <i>Syncolostemon pretoriae</i> (Gürke) D.F.Otieno                                                |
|                                 | <i>Syncolostemon punctatus</i> (Codd) D.F.Otieno                                                 |
|                                 | <i>Syncolostemon ramosus</i> (Codd) D.F.Otieno                                                   |
|                                 | <i>Syncolostemon ramulosus</i> E.Mey. ex Benth.                                                  |
|                                 | <i>Syncolostemon rehmannii</i> (Gürke) D.F.Otieno                                                |
|                                 | <i>Syncolostemon rotundifolius</i> E.Mey. ex Benth.                                              |
|                                 | <i>Syncolostemon rugosifolius</i> (M.Ashby) D.F.Otieno                                           |
|                                 | <i>Syncolostemon stalmansii</i> (A.J.Paton & K.Balkwill) D.F.Otieno                              |
|                                 | <i>Syncolostemon stenophyllus</i> (Gürke) D.F.Otieno                                             |
|                                 | <i>Syncolostemon subvelutinus</i> (Gürke) D.F.Otieno                                             |
|                                 | <i>Syncolostemon teucrifolius</i> (Hochst.) D.F.Otieno                                           |
|                                 | <i>Syncolostemon thorncroftii</i> (N.E.Br.) D.F.Otieno                                           |
|                                 | <i>Syncolostemon transvaalensis</i> (Schltr.) D.F.Otieno                                         |
|                                 | <i>Syncolostemon welwitschii</i> (Rolfe) D.F.Otieno [= <i>Orthosiphon pseudornatus</i> R.D.Good] |
| <i>Tetradenia</i> Benth.        | <i>Tetradenia bainesii</i> (N.E.Br.) Phillipson & C.F.Steyn                                      |
|                                 | <i>Tetradenia barberae</i> (N.E.Br.) Codd                                                        |
|                                 | <i>Tetradenia brevispicata</i> (N.E.Br.) Codd                                                    |
|                                 | <i>Tetradenia galpinii</i> (N.E.Br.) Phillipson & C.F.Steyn                                      |
|                                 | <i>Tetradenia kaokoensis</i> van Jaarsv. & A.E.van Wyk                                           |
|                                 | <i>Tetradenia riparia</i> (Hochst.) Codd                                                         |
|                                 | <i>Tetradenia tuberosa</i> T.J.Edwards                                                           |
| <i>Teucrium</i> L.              | <i>Teucrium africanum</i> Thunb.                                                                 |
|                                 | <i>Teucrium kraussii</i> Codd                                                                    |
|                                 | <i>Teucrium sessiliflorum</i> Benth. [= <i>T. trifidum</i> Schltdl.]                             |
| <i>Thorncroftia</i> N.E.Br.     | <i>Thorncroftia greenii</i> Changwe & K.Balkwill                                                 |
|                                 | <i>Thorncroftia longiflora</i> N.E.Br.                                                           |
|                                 | <i>Thorncroftia lotteri</i> T.J.Edwards & McMurtry                                               |
|                                 | <i>Thorncroftia media</i> Codd                                                                   |
|                                 | <i>Thorncroftia succulenta</i> (R.A.Dyer & E.A.Bruce) Codd                                       |
|                                 | <i>Thorncroftia thorncroftii</i> (S.Moore) Codd                                                  |
| <i>Tinnea</i> Kotschy ex Hookf. | <i>Tinnea barbata</i> Vollesen                                                                   |
|                                 | <i>Tinnea eriocalyx</i> Welw.                                                                    |
|                                 | <i>Tinnea galpinii</i> Briq.                                                                     |
|                                 | <i>Tinnea rhodesiana</i> S.Moore                                                                 |

| Genus                      | Species                                                                                                                                                                                                                                                                                                           |
|----------------------------|-------------------------------------------------------------------------------------------------------------------------------------------------------------------------------------------------------------------------------------------------------------------------------------------------------------------|
| Vitex L.                   | <i>Vitex angolensis</i> Gürke                                                                                                                                                                                                                                                                                     |
|                            | <i>Vitex ferruginea</i> Schumach. & Thonn. [= <i>V. amboniensis</i> Gurke, <i>V. ferruginea</i> Schumach. & Thonn. <i>subsp. amboniensis</i> (Gurke) Verdc. <i>var. amboniensis</i> and <i>V. ferruginea</i> Schumach. & Thonn. <i>subsp. amboniensis</i> (Gurke) Verdc. <i>var. amaniensis</i> (W.Piep.) Verdc.] |
|                            | <i>Vitex harveyana</i> H.Pearson                                                                                                                                                                                                                                                                                  |
|                            | <i>Vitex mombassae</i> Vatke                                                                                                                                                                                                                                                                                      |
|                            | <i>Vitex mooiensis</i> H.Pearson [= <i>Premna mooiensis</i> (H.Pearson) W.Piep.]                                                                                                                                                                                                                                  |
|                            | <i>Vitex obovata</i> E.Mey. [= <i>V. obovata</i> E.Mey. <i>subsp. obovata</i> and <i>V. obovata</i> E.Mey. <i>subsp. wilmsii</i> (Gürke) Bredenk. D.J.Botha]                                                                                                                                                      |
|                            | <i>Vitex patula</i> E.A.Bruce                                                                                                                                                                                                                                                                                     |
|                            | <i>Vitex pooara</i> Corbishley                                                                                                                                                                                                                                                                                    |
|                            | <i>Vitex rehmannii</i> Gürke                                                                                                                                                                                                                                                                                      |
|                            | <i>Vitex trifolia</i> L.*                                                                                                                                                                                                                                                                                         |
|                            | <i>Vitex zeyheri</i> Sond. ex Schauer                                                                                                                                                                                                                                                                             |
| <i>Volkameria</i> P.Browne | <i>Volkameria glabra</i> (E.Mey.) Mabb. & Y.W.Yuan [= <i>Clerodendrum glabrum</i> E.Mey.]                                                                                                                                                                                                                         |

**Table S2.** Publications consulted for ethnobotanical data.

| <b>Genus</b>           | <b>Publications consulted</b>                                                       |
|------------------------|-------------------------------------------------------------------------------------|
| <i>Acrotome</i>        | [17,327-329,342,345,365,418-420]                                                    |
| <i>Aeollanthus</i>     | [327]                                                                               |
| <i>Ajuga</i>           | [327,328,331]                                                                       |
| <i>Clerodendrum</i>    | [329,330]                                                                           |
| <i>Coleus</i>          | [17,327,331,338,340-343,359,418]                                                    |
| <i>Equilabium</i>      | [331,338,342,343,359,360,418-420]                                                   |
| <i>Hoslundia</i>       | [331,342,345,418-420]                                                               |
| <i>Kalaharia</i>       | [329,365,418,420]                                                                   |
| <i>Leonotis</i>        | [327,328,330,331,338,342,343,345,351,359-361,363-365,378,383,393-395,418-421]       |
| <i>Leucas</i>          | [17,327,331,338,345,351,363-365,378,383,418,420,422]                                |
| <i>Marrubium</i>       | [327,343,369,370,420]                                                               |
| <i>Mentha</i>          | [15,17,327,328,331,338,342,343,351,359,361,363,369,378,393,394,396,418-421,423,424] |
| <i>Micromeria</i>      | [343]                                                                               |
| <i>Ocimum</i>          | [17,327-329,331,338,342,343,345,359,361,365,378,379,418-420]                        |
| <i>Plectranthus</i>    | [327-329,331,338,340,341,359,361,364,383]                                           |
| <i>Prunella</i>        | [331]                                                                               |
| <i>Pseudodictamnus</i> | [15,327,343,351,359,363,378,393,394,396,418,420,421,423,424]                        |
| <i>Rothea</i>          | [328,331,338,385,407,418,420]                                                       |
| <i>Salvia</i>          | [15,327,328,338,343,351,359,363,365,378,393-396,418,420,421,423-425]                |
| <i>Stachys</i>         | [17,327,328,330,331,338,343,345,351,360,363,378,393,394,396,418,420,421]            |
| <i>Syncolostemon</i>   | [327,329,331,338,365,418,420]                                                       |
| <i>Tetradenia</i>      | [15,327,331,338,343,359,364,369,378,383,385]                                        |
| <i>Teucrium</i>        | [15,17,327,338,343,351,363,369,378,395,418,420]                                     |
| <i>Vitex</i>           | [327,338,342,385,407,418-420]                                                       |
